# Supplementary material for: Explorative data analysis of MCL reveals gene expression networks implicated in survival and prognosis supported by explorative CGH analysis
Source: PubMed Central journal article supplement (PMC2442114; doi:10.1186/1471-2407-8-106), 2008-04-16

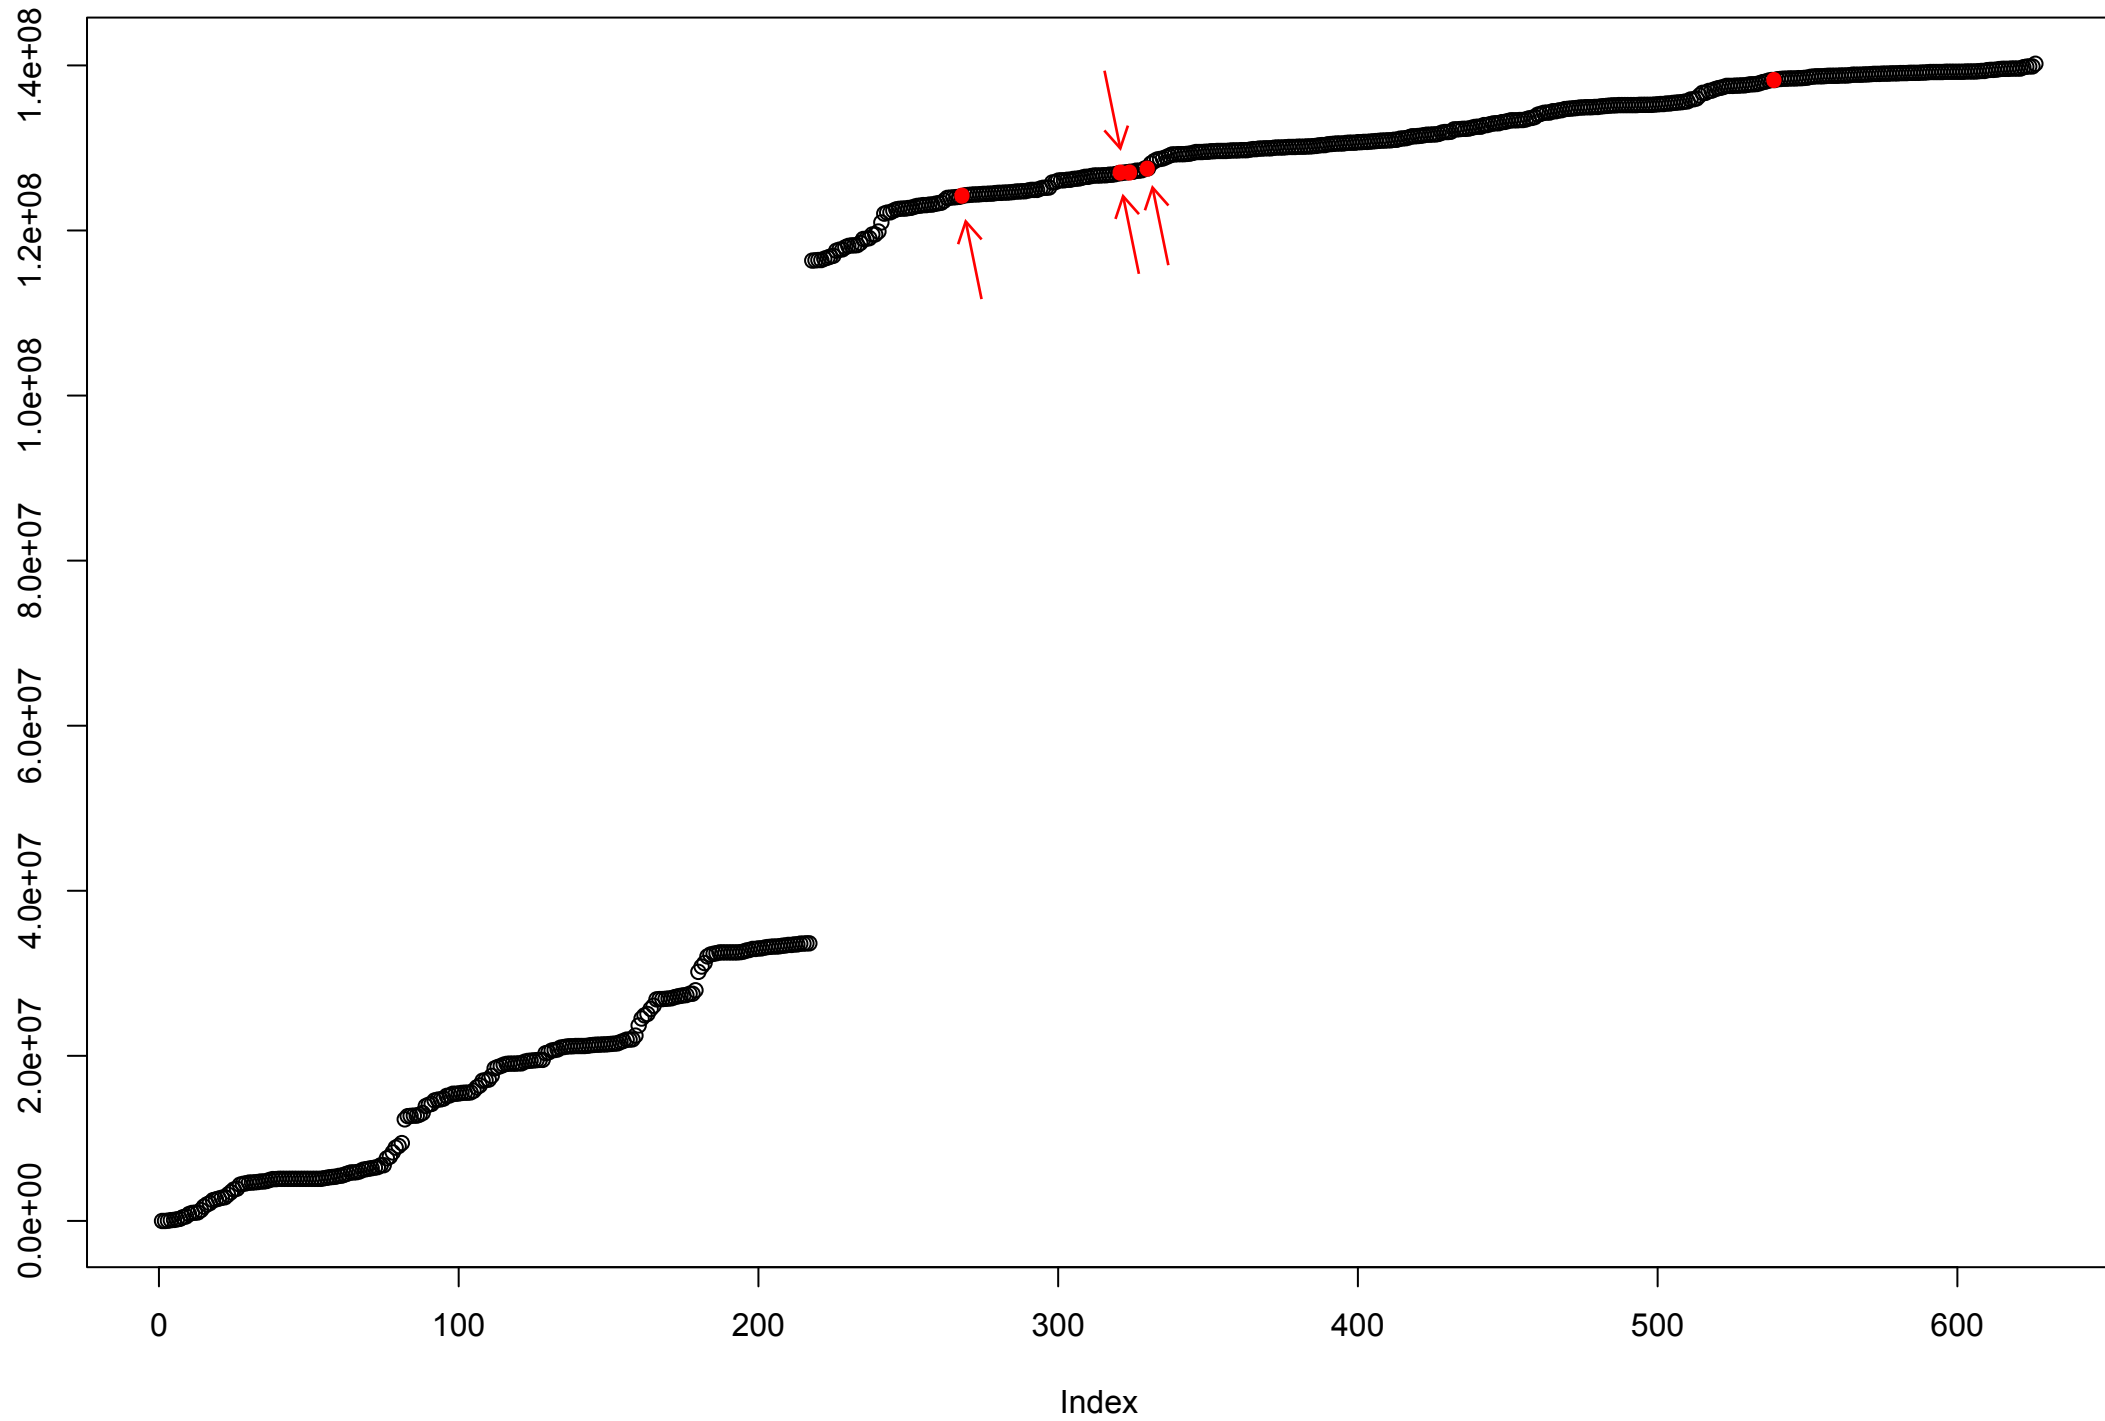

Supplement: 1471-2407-8-106-S4.pdf [file 1471-2407-8-106-S4.pdf]
